# Supplementary material
Source: PubMed Central journal article supplement (PMC4601609)
Supplement: supp_hpv029_Fleming_AppendicesAtoE.pdf [file supp_hpv029_Fleming_AppendicesAtoE.pdf]

# Community-based self-screening and non-physician screening of hypertension in adults: systematic review

## Supplementary information

### Appendix A: Medline Search Strategy

|    | Search terms                                                                                                                                                                                 |
|----|----------------------------------------------------------------------------------------------------------------------------------------------------------------------------------------------|
| 1  | Blood Pressure Determination/                                                                                                                                                                |
| 2  | exp sphygmomanometers/ or blood pressure monitors/                                                                                                                                           |
| 3  | exp Hypertension/di [Diagnosis]                                                                                                                                                              |
| 4  | (sphygmomanometer? or manometer?).ti,ab.                                                                                                                                                     |
| 5  | ((blood pressure or bp or hypertens*) adj3 monitor?).ti,ab.                                                                                                                                  |
| 6  | ((blood pressure or bp or hypertens*) adj3 machine?).ti,ab.                                                                                                                                  |
| 7  | ((blood pressure or bp or hypertens*) adj3 measure*).ti,ab.                                                                                                                                  |
| 8  | ((blood pressure or bp or hypertens*) adj3 device?).ti,ab.                                                                                                                                   |
| 9  | ((blood pressure or bp or hypertens*) adj3 screen*).ti,ab.                                                                                                                                   |
| 10 | ((blood pressure or bp or hypertens*) adj3 diagnos*).ti,ab.                                                                                                                                  |
| 11 | ((blood pressure or bp or hypertens*) adj3 detect*).ti,ab.                                                                                                                                   |
| 12 | or/1-11                                                                                                                                                                                      |
| 13 | Mass Screening/                                                                                                                                                                              |
| 14 | Public Facilities/                                                                                                                                                                           |
| 15 | Restaurants/                                                                                                                                                                                 |
| 16 | fitness centers/                                                                                                                                                                             |
| 17 | pharmacies/ or community pharmacy services/ or pharmacists/                                                                                                                                  |
| 18 | exp dental facilities/ or exp dental staff/ or exp dentists/ or dental care/                                                                                                                 |
| 19 | community health services/                                                                                                                                                                   |
| 20 | Student Health Services/                                                                                                                                                                     |
| 21 | Health Fairs/ or Mobile Health Units/                                                                                                                                                        |
| 22 | Social Work/                                                                                                                                                                                 |
| 23 | screen*.ti.                                                                                                                                                                                  |
| 24 | ((community* or mobile or target* or public health) adj5 screen*).ti,ab.                                                                                                                     |
| 25 | (community* adj3 (based or service?)).ti,ab.                                                                                                                                                 |
| 26 | community?.ti.                                                                                                                                                                               |
| 27 | social worker?.ti,ab.                                                                                                                                                                        |
| 28 | ((dental adj (staff or personnel or worker? or care)) or dentist?).ti,ab.                                                                                                                    |
| 29 | (pharmacy* or pharmacies or pharmacist? or drugstore? or drug store?).ti,ab.                                                                                                                 |
| 30 | (public adj3 (place? or space? or location?)).ti,ab.                                                                                                                                         |
| 31 | (supermarket? or grocery store? or food store? or convenience store? or retail store? or retail outlet? or retail environment or food store? or shop? or restaurant? or food outlet?).ti,ab. |
| 32 | ((leisure or fitness or sport?) adj3 (centre? or center? or facility or facilities)).ti,ab.                                                                                                  |
| 33 | (mobile unit? or mobile service? or mobile clinic? or mobile van? or door-to-door).ti,ab.                                                                                                    |

|    |                                                                                                                                                                                                  |
|----|--------------------------------------------------------------------------------------------------------------------------------------------------------------------------------------------------|
| 34 | kiosk?.ti,ab.                                                                                                                                                                                    |
| 35 | waiting room?.ti,ab.                                                                                                                                                                             |
| 36 | "out of office".ti,ab.                                                                                                                                                                           |
| 37 | or/13-36                                                                                                                                                                                         |
| 38 | 12 and 37                                                                                                                                                                                        |
| 39 | ((automatic or automated) adj2 (blood pressure or bp)).ti,ab.                                                                                                                                    |
| 40 | ((automatic or automated) adj5 (measure* or diagnos* or test* or screen* or detect*) adj10 (blood pressure or bp or hypertens*)).ti,ab.                                                          |
| 41 | ((automatic or automated) and (measure* or diagnos* or test* or screen* or detect*) and (blood pressure or bp or hypertens*)).ti.                                                                |
| 42 | ((automatic or automated) adj2 (sphygmomanometer? or manometer?)).ti,ab.                                                                                                                         |
| 43 | (self* adj5 (measure* or diagnos* or test* or screen* or detect*) adj10 (blood pressure or bp or hypertens*)).ti,ab.                                                                             |
| 44 | (self* and (measure* or diagnos* or test* or screen* or detect*) and (blood pressure or bp or hypertens*)).ti.                                                                                   |
| 45 | ((self-measure* or selfmeasure* or self-test* or selftest* or self-screen* or selfscreen*) adj3 (blood pressure or bp)) or SBPM).ti,ab.                                                          |
| 46 | (self-blood pressure measure* or self-blood pressure test* or self-blood pressure screen*).ti,ab.                                                                                                |
| 47 | (Blood Pressure Determination/ or exp sphygmomanometers/ or blood pressure monitors/ or exp Hypertension/di) and (Telemedicine/ or (telemedicine or telecare or tele-medicine or tele-care).ti.) |
| 48 | 38 or 39 or 40 or 41 or 42 or 43 or 44 or 45 or 46 or 47                                                                                                                                         |
| 49 | exp animals/ not human/                                                                                                                                                                          |
| 50 | 48 not 49                                                                                                                                                                                        |

## Appendix B: Quality assessment checklist

| Question                                                       | Possible answers |
|----------------------------------------------------------------|------------------|
| Could the patient selection method have introduced bias?*      | Yes No Unclear   |
| Are the patients and setting appropriate to the review?        | Yes No Unclear   |
| Was the blood pressure measured in a standardised manner?      | Yes No Unclear   |
| Was a pre-specified, appropriate, hypertension threshold used? | Yes No Unclear   |
| Was there blinding to existing hypertension status?            | Yes No Unclear   |

\* For visualisation of quality assessment, this question was changed to "Did the patient selection method avoid introducing bias?", with the numbers reporting "yes" and "no" switched, so that all "yes" answers would correspond to higher quality.

## Appendix C: Characteristics of Included Studies

| Study (Author, date)               | Setting                                                  | Population                        | Age range         | Number screened | Screeners                                                                            | Measurement method                                                                                 | Hypertension cut-off                       | Recruitment method                                                                           | Presentation of results                                                                         | Other screening offered                                  |
|------------------------------------|----------------------------------------------------------|-----------------------------------|-------------------|-----------------|--------------------------------------------------------------------------------------|----------------------------------------------------------------------------------------------------|--------------------------------------------|----------------------------------------------------------------------------------------------|-------------------------------------------------------------------------------------------------|----------------------------------------------------------|
| <b>Abbott, 1989</b> <sup>1</sup>   | Shopping centre, Calgary, Canada                         | General population                | Mostly aged 25-44 | 639             | Nurses                                                                               | Manual BP following 3-5 minute rest period                                                         | 140/95 if <45y, 160/95 if ≥45y             | Mass media and paper advertising                                                             | Nurse discussed reading and provided health counselling as necessary                            | None                                                     |
| <b>Agarwal, 2013</b> <sup>2</sup>  | Housing complex and apartment building, Hamilton, Canada | Residents                         | Not specified     | 240             | Trained paramedics                                                                   | Not specified                                                                                      | Not specified                              | Drop-in sessions                                                                             | Not specified                                                                                   | Diabetes, cardiovascular risk status, lifestyle          |
| <b>Ailinger, 1984</b> <sup>3</sup> | Participants' homes, Arlington county, Virginia, USA     | Hispanic adults                   | Not specified     | 330             | 3 bilingual assistants                                                               | Single manual BP reading                                                                           | 140/90                                     | Telephone invitation                                                                         | BP result given in writing with leaflet. Participants with elevated BP advised to see physician | None                                                     |
| <b>Artz, 1981</b> <sup>4</sup>     | Apartment complexes, Memphis, USA                        | Residents of apartment complexes  | Not specified     | 298             | Community volunteers (door-to-door screening), and students (central site screening) | 3 BP measurements                                                                                  | 140/90                                     | Door-to-door and by written invitation                                                       | Participants with elevated BP were offered rescreening or advised to seek treatment             | None                                                     |
| <b>Banack, 2012</b> <sup>5</sup>   | Community pharmacies, Montreal, Canada                   | Pharmacy clients                  | 20-89             | 238             | Graduate students from health-related backgrounds trained as health coaches          | Automated BP using arm cuff                                                                        | 140/90 if not diabetic, 130/80 if diabetic | Bilingual posters and fliers, and direct invitation from pharmacists and pharmacy assistants | Participants given copy of risk profile, and access to information on a bilingual website       | Weight, height, waist circumference, cardiovascular risk |
| <b>Bandl, 1990</b> <sup>6</sup>    | Dental surgery, Szeged, Hungary                          | Patients attending dental surgery | Not specified     | 1004            | Dentist                                                                              | 2 manual BP measurements after 10 minute rest period, before any dental interventions or treatment | 160/95                                     | Patients attending for dental appointments                                                   | Advised to seek specialist advice                                                               | None                                                     |
| <b>Berkson, 1980</b> <sup>7</sup>  | Mobile screening unit, Chicago, USA                      | General population                | 18-65             | 295646          | Nurses, paramedics and hypertension                                                  | 2 BP measurements                                                                                  | -/95                                       | Mass media and paper advertising                                                             | Participants with intermediate BP offered rescreening.                                          | None                                                     |

|                                       |                                                 |                                                                         |                           |        |                                                          |                                                  |               |                                            |                                                                                                              |                                                                                                                         |
|---------------------------------------|-------------------------------------------------|-------------------------------------------------------------------------|---------------------------|--------|----------------------------------------------------------|--------------------------------------------------|---------------|--------------------------------------------|--------------------------------------------------------------------------------------------------------------|-------------------------------------------------------------------------------------------------------------------------|
|                                       |                                                 |                                                                         |                           |        | technicians                                              |                                                  |               |                                            | Participants with elevated BP referred.                                                                      |                                                                                                                         |
| <b>Berwick, 1985<sup>8</sup></b>      | Health fairs, USA                               | Attendees at health fairs                                               | Not specified             | 116447 | Volunteer screeners                                      | Not specified                                    | 160/90        | Not specified                              | Telephone follow-up (recommended)                                                                            | Multiple, including height, weight, visions, anaemia, hearing, cancer screens, blood chemistry, and faecal occult blood |
| <b>Bodden, 1980<sup>9</sup></b>       | Dental clinics, Birmingham, USA                 | Patients attending the Oral Diagnosis Clinic at the School of Dentistry | 18-74                     | 2006   | 3 <sup>rd</sup> and 4 <sup>th</sup> year dental students | Manual BP                                        | 160/95        | Patients attending for dental appointments | Not specified                                                                                                | None                                                                                                                    |
| <b>Bray, 1991<sup>10</sup></b>        | Door-to-door, Chicago, USA                      | Hispanic adults                                                         | >18 years                 | 3399   | Bilingual outreach workers                               | 1 BP measurement                                 | 140/85        | Paper advertising                          | Participants with elevated BP were rescreened immediately, and referred to a nurse if still elevated.        | None                                                                                                                    |
| <b>Brunt, 1992<sup>11</sup></b>       | Hutterite colony, Alberta, Canada               | Hutterites from Dariusleut colonies                                     | 30-74 years               | 811    | Registered nurses                                        | 2 manual BP readings after 5 minutes rest period | -/90          | Not specified                              | BP result given in writing with leaflet. Recommendations for rescreening with physician based on BP reading. | Cholesterol, postprandial blood glucose, height, and weight                                                             |
| <b>Campbell, 2001<sup>12</sup></b>    | Fire stations, Calgary, Canada                  | General population                                                      | Not stated                | 3477   | Fire fighters                                            | 2 manual BP readings                             | 140/90        | Mass media and paper advertising           | BP result given in writing with instructions regarding follow-up with physician.                             | None                                                                                                                    |
| <b>Carrington, 2008<sup>13</sup></b>  | High traffic public areas, Australia            | General population                                                      | 18-96 years               | 13687  | Nurses                                                   | Not specified                                    | 140/90        | Not specified                              | Not specified                                                                                                | Waist and hip circumference, BMI, cardiovascular risk factors                                                           |
| <b>Carrington, 2009a<sup>14</sup></b> | Public areas, Australia                         | General population                                                      | Not stated                | 13825  | Nurses                                                   | Automated BP measurement                         | 140/90        | Not specified                              | Not specified                                                                                                | Cardiovascular risk factors                                                                                             |
| <b>Carrington, 2009b<sup>15</sup></b> | Mobile cardiovascular screening unit, Australia | Residents in regional communities with medium-high CV                   | 57years ( $\pm$ 15 years) | 221    | Nurses and trained study personnel                       | Automated BP measurement                         | Not specified | Not specified                              | Not specified                                                                                                | Cardiovascular risk factors, edinburgh claudication                                                                     |

|                                       |                                                                              |                                                                 |                                |        |                            |                                                                |                                      |                                                        |                                                                                               |                                         |
|---------------------------------------|------------------------------------------------------------------------------|-----------------------------------------------------------------|--------------------------------|--------|----------------------------|----------------------------------------------------------------|--------------------------------------|--------------------------------------------------------|-----------------------------------------------------------------------------------------------|-----------------------------------------|
|                                       |                                                                              | risk                                                            |                                |        |                            |                                                                |                                      |                                                        |                                                                                               | score, ankle-brachial index, depression |
| <b>Carrington, 2010</b> <sup>16</sup> | Public areas, Australia                                                      | General population                                              | 48.4 years ( $\pm 16.0$ years) | 13825  | 300 registered nurses      | 2 automated BP measurements after 5 minute rest period         | 140/90                               | Paper advertising and verbal invitation                | BP result given in writing with leaflet. Participants with elevated BP advised to contact GP. | Waist-hip circumference, height, weight |
| <b>Carter, 1997</b> <sup>17</sup>     | Dental practice and oral surgery department, Newcastle and South Shields, UK | Dental patients scheduled for treatment under local anaesthesia | Not specified                  | 399    | Dentists                   | Not specified                                                  | -/95                                 | Not specified                                          | Not specified                                                                                 | None                                    |
| <b>Cavaco, 2010</b> <sup>18</sup>     | Pharmacy, Almada, Portugal                                                   | Pharmacy Customers                                              | Median Age 66                  | 51     | Pharmacists                | Automated BP measurement                                       | 139/89                               | Verbal Invitation                                      | Pharmacist presented results                                                                  |                                         |
| <b>Chiolero, 2008</b> <sup>19</sup>   | Mobile Unit, Lignes Canton de Vaud, Switzerland                              | General Population                                              | 56.7                           | 1598   | 2 Health Educators         | Automated BP measurement after 5 minutes rest repeated if high | 140/90                               | Advertisements in mass media                           | Counselling and card with risk level.                                                         | BMI, Blood Glucose, Cholesterol         |
| <b>Clark, 2000</b> <sup>20</sup>      | Community Outreach Partnership Centre, USA                                   | Targetted population including 'breadline' and 'seniors'        | Not specified                  | 343    | Community Nurses           | Not specified                                                  | -/90                                 | Not specified                                          | Unspecified Referral                                                                          |                                         |
| <b>Cooke, 1983</b> <sup>21</sup>      | 3 apartment complexes, USA                                                   | Residents of apartments                                         | Not specified                  | 265    | Volunteer Residents        | Not specified                                                  | -/95                                 | Door to door visits                                    | Not specified                                                                                 |                                         |
| <b>Datri, 1980</b> <sup>22</sup>      | Mutiple sites including hospitals, supermarkes, town halls.                  | General Population                                              | 19-70                          | 189006 | Trained personnel          | Single manual measurement                                      | 140/90 if <40y, 160/95 if $\geq 40y$ | Advertisements in newspapers, on TV, radio and posters | Referral to clinic if hypertensive                                                            |                                         |
| <b>Davidson, 2004</b> <sup>23</sup>   | 3 island communities off Maryland coast, USA                                 | Island population                                               | Not specified                  | 273    | Nurse and nursing students | Not specified                                                  | Not specified                        | Advertisements in church and community buildings       | Directly to patient                                                                           | CVD screening including hba1c           |
| <b>Diaz-Perez, 2004</b> <sup>24</sup> | Mobile Unit visting 5 towns in 3 counties, Colorado, USA                     | Rural Mexican immigrants                                        | Not specified                  | 1098   | Medical assistants         | Not specified                                                  | 140/90                               | Via bus                                                | Not specified                                                                                 |                                         |
| <b>Earle, 2001</b> <sup>25</sup>      | Six community pharmacies, London UK.                                         | General population attending pharmacy                           | 54.6                           | 263    | Pharmacists                | Automated BP                                                   | 160/95                               | Advertisements in newspapers and leaflets in pharmacy  | Letters to patients +/- GP                                                                    |                                         |
| <b>Eason, 2012</b> <sup>26</sup>      | Mobile blood donation sites,                                                 | Volunteer blood donors                                          | >18                            | 58530  | Phlebotomists              | Automated BP                                                   | 140/90                               | Not specified                                          | Not specified                                                                                 | None                                    |

|                                      |                                                           |                                                    |               |               |                                        |                                                       |                                                   |                                    |                                                                                                               |                                                 |
|--------------------------------------|-----------------------------------------------------------|----------------------------------------------------|---------------|---------------|----------------------------------------|-------------------------------------------------------|---------------------------------------------------|------------------------------------|---------------------------------------------------------------------------------------------------------------|-------------------------------------------------|
|                                      | USA                                                       |                                                    |               |               |                                        |                                                       |                                                   |                                    |                                                                                                               |                                                 |
| <b>Edwards, 1981</b> <sup>27</sup>   | Nine Pharmacies, UK                                       | General population attending pharmacy              | Not specified | 215           | Pharmacists                            | Two seated readings with automated BP 5 minutes apart | 160/100 if ≤50y, 160/105 if 51-60y, -/110 if >60y | Via pharmacy.                      | Written record                                                                                                |                                                 |
| <b>Elder, 1986</b> <sup>28</sup>     | Community Festival and door to door, Pawtucket, USA       | General Population                                 | 18-65         | 372           | Volunteers                             | Manual BP measurement                                 | 141/90                                            | Press release                      | Referral if high                                                                                              | Weight, % body fat, cholesterol, smoking status |
| <b>Engstrom, 2011</b> <sup>29</sup>  | Dental Clinics, Gavleborg, Sweden                         | Patients attending dental clinics                  | 20-65         | 1149          | Dental Hygienist                       | Automated sitting BP, two readings if high.           | 160/90                                            | By letter                          | Referral if high                                                                                              |                                                 |
| <b>Frank, 2008</b> <sup>30</sup>     | Churches, North Florida, USA                              | African American Parishoners                       | 18-83         | 55            | Nursing students and nurse researchers | Not specified                                         | 140/90                                            |                                    | Card with results                                                                                             | Height, weight, blood sugar.                    |
| <b>Gany, 2012</b> <sup>31</sup>      | Community-based health camps, New York, USA               | South Asian immigrants                             | 18-65         | 265           | Trained non-medical staff and nurses   | Not specified                                         | 140/90                                            | Not specified                      | Physicians or nurses provided counselling on implications and information or referral to area health services | Glucose, HDL, LDL                               |
| <b>Ghuri, 2005</b> <sup>32</sup>     | Health Fair at Central Mosque, Edinburgh, UK              | Muslims attending health fair                      | Not specified | 99            | Nurses                                 | Not specified                                         | Not specified                                     | From those attending Friday Prayer | Written record                                                                                                | Blood Glucose                                   |
| <b>Greenburg, 2007</b> <sup>33</sup> | Oral Health Clinics, New Jersey, USA                      | Patients at oral health clinic                     | 40-69         | Not specified | Oral healthcare practitioners          | Not specified                                         | 140/-                                             | When attending clinic              | Referral                                                                                                      |                                                 |
| <b>Guay, 2011</b> <sup>34</sup>      | Pharmacies, Albony, USA                                   | Male patients attending pharmacy                   | 50.2          | 388           | Student Pharmacists                    | Not specified                                         | Not specified                                     | Not specified                      | Not specified                                                                                                 | Pulse, BMI                                      |
| <b>Hamilton, 2003</b> <sup>35</sup>  | Multiple open access sites, Exeter, UK                    | Deprived populations targetted with site locations | 0-100         | 769           | Self                                   | Automated BP machine with arm or wrist cuff.          | 135/85                                            | Posters at screening sites         | Print out from machine                                                                                        | None                                            |
| <b>Hampton, 1990</b> <sup>36</sup>   | Pharmacy, Nottingham, UK                                  | Patients attending pharmacy.                       | 17-74         | 70            | Pharmacist                             | Automated BP machine                                  | -/90                                              | Invited by pharmacist              | Letter for GP given to patient or sent directly to GP if BP >100 mmhg                                         | None                                            |
| <b>Harris, 2011</b> <sup>37</sup>    | Mobile Unit at community and workplace events, Maine, USA | Population attending events                        | Not specified | 2420          | Nurses and Nursing students            | Automated BP machine                                  | 140/90                                            | People approached mobile unit      | Written on card and advised to take to next primary care visit                                                | Blood glucose                                   |
| <b>Hill, 2012</b> <sup>38</sup>      | Family Van in community sites,                            | Underserved/low income                             | Not specified | 2834          | Health Educators                       | Manual sphygmanometer                                 | 140/90                                            | Knowledgeable neighbour            | Written card with results. Referred to                                                                        | BMI, Blood glucose,                             |

|                                        |                                               |                                                               |               |         |                                               |                                                                                      |                                            |                                                                                                           |                                                                     |                                    |
|----------------------------------------|-----------------------------------------------|---------------------------------------------------------------|---------------|---------|-----------------------------------------------|--------------------------------------------------------------------------------------|--------------------------------------------|-----------------------------------------------------------------------------------------------------------|---------------------------------------------------------------------|------------------------------------|
|                                        | Harvard, USA                                  | population                                                    |               |         |                                               |                                                                                      |                                            | model                                                                                                     | community health centre if elevated.                                | cholesterol                        |
| <b>Holmen, 1991</b> <sup>39</sup>      | Mobile screening unit, Nord-Trondelag, Norway | Aged over 20                                                  | 20-101        | 74977   | Nurses                                        | Manual sphymanometer after sitting for two minutes. Repeated again after two minutes | Linear formula dependent on age and sex    | Personal invitation via letter                                                                            | Not specified                                                       | Height, weight, Pulse, Chest Xray. |
| <b>Houle, 2013</b> <sup>40-42</sup>    | Pharmacies, Canada                            | Casual kiosk users and those enrolled in "Smart card" program | Not specified | 8457552 | Self screening                                | Not specified                                                                        | 140/90                                     | Not specified                                                                                             | Not specified                                                       | Not specified                      |
| <b>Huckerby, 2006</b> <sup>43</sup>    | Pharmacies, Dudley Beacon and Castle PCT, UK  | Black and ethnic minority communities                         | Not specified | 70      | Pharmacists                                   | Not specified                                                                        | 150/90                                     | Community groups contacted                                                                                | Advice given                                                        | None                               |
| <b>Jacobsen, 1992</b> <sup>44</sup>    | Multiple community sites, Nordland, Norway.   | All residents aged 40-42                                      | 40-42         | 8612    | Nurses                                        | Automated BP machine, mean of 2 <sup>nd</sup> and 3 <sup>rd</sup> readings           | Not specified                              | Personal invitation by letter                                                                             | Not specified                                                       | Cholesterol and triglycerides.     |
| <b>Johnson 1984</b> <sup>45</sup>      | Community based, Memphis, USA                 | Adults from low income families, predominantly black          | 18+           | 151     | High school students, health aides and nurses | Manual device, 3 seated measurements                                                 | 160/90                                     | Letters to household followed by door-to-door approach. Additional invites to neighbourhood health centre | Referred to community health centre or private physician            | None                               |
| <b>Jones 2008</b> <sup>46</sup>        | Community pharmacy, Alberta, Canada           | Patients attending pharmacy                                   | 65+           | 403     | Volunteer peer health educators aged 55+      | Automated device, 6 measurements at 1 minute intervals                               | 140/80 if not diabetic, 130/80 if diabetic | Personalised invitation from family physician, notices in pharmacies, community wide advertisements       | Referral based on protocol                                          | None                               |
| <b>Kaczorowski 2011</b> <sup>47</sup>  | Community based, Ontario, Canada              | Community dwelling adults (65+)                               | Mean 74.82    | 15899   | Trained volunteers                            | Automated device, validated                                                          | Not specified                              | Invitation letter from family physician, hand delivered referral letters, encouragement from pharmacist   | Results sent to family physicians, self-management support provided | Cardiovascular risk factors        |
| <b>Karwalajtys, 2013</b> <sup>48</sup> | Community pharmacies,                         | General population >65                                        | >65           | 2350    | Volunteer peer educators                      | Bptru automated device, 6                                                            | 140/90 if no diabetes, 130/80              | Posters, flyers, mass media,                                                                              | Data sent to physician,                                             | CVD risk                           |

|                                     |                                                   |                                         |               |      |                                                                      |                                                                        |               |                                                        |                                                                                                                                             |                                                         |
|-------------------------------------|---------------------------------------------------|-----------------------------------------|---------------|------|----------------------------------------------------------------------|------------------------------------------------------------------------|---------------|--------------------------------------------------------|---------------------------------------------------------------------------------------------------------------------------------------------|---------------------------------------------------------|
|                                     | Ontario, Canada                                   | years                                   |               |      | aged >55                                                             | measurements taken, average of last 5 used                             | if diabetic   | advertising, direct letters                            | participant given appropriate educational materials by volunteers                                                                           |                                                         |
| <b>Kling, 2013</b> <sup>49</sup>    | Community health event, Rochester, Minnesota, USA | General female population               | 15-93         | 294  | Nurses                                                               | Seated                                                                 | Not specified | Not specified                                          | Results given on a card. Participants encouraged to talk with hcps who were present at the screening site                                   | Glucose, lipid panel, BMI                               |
| <b>Latiff, 2012</b> <sup>50</sup>   | Housing estate, Singapore                         | Housing estate residents                | Mean 60.5     | 174  | Trained nursing students                                             | Not specified                                                          | 130/80        | Not specified                                          | Not specified                                                                                                                               | BMI, waist circumference                                |
| <b>Lucky 2011</b> <sup>51</sup>     | Shopping centre, California, USA                  | Adult shoppers                          | 18+           | 958  | Trained volunteers                                                   | Manual                                                                 | 140/90        | Health fair at shopping centre                         | Preprinted screening forms. Where hypertensive given literature and written and verbal instructions to follow up with primary care provider | None                                                    |
| <b>Mangum 2003</b> <sup>52</sup>    | Pharmacy, Iowa, USA                               | Adults visiting pharmacy                | 19-94         | 351  | Pharmacists, pharmacy students, community pharmacy practice resident | Automated device, if high second measurement taken using manual device | 140/90        | Offered screening as entering pharmacy                 | Referral to physician if high                                                                                                               | None                                                    |
| <b>Manry, 2013</b> <sup>53</sup>    | Courthouse, Western Kansas, USA                   | Residents of rural midwestern community | Not specified | 189  | Nurses and student nurses                                            | Not specified                                                          | Not specified | Local newspaper and facebook                           | Not specified                                                                                                                               | Weight, height, BMI, blood glucose, waist circumference |
| <b>Marshall, 2013</b> <sup>54</sup> | Senior centres, New York, USA                     | Participants in eldersmile programme    | >=50          | 580  | Dental assistants                                                    | Not specified                                                          | 140/90        | Not specified                                          | Not specified                                                                                                                               | Hba1c                                                   |
| <b>McConaha, 2013</b> <sup>55</sup> | Grocery store pharmacies, Pennsylvania, USA       | People attending 3 pharmacies           | 22-86         | 43   | Pharmacy students                                                    | Not specified                                                          | 140/90        | Flyers in pharmacy and nearby community health centres | Counselled on results by screener                                                                                                           | Non-fasting cholesterol, blood glucose, BMI             |
| <b>Nugent 1980</b> <sup>56</sup>    | Parking lot, grocery store, Arizona, USA          | People attending grocery store and      | 17+           | 2726 | Heart association employees and volunteers                           | Manual, seated for 2-5 min, right arm                                  | 159/94        | Publications on TV, radio and in Newspapers            | High BP then told to see physician                                                                                                          | Rescreening at 1 year                                   |



|                                     |                                                                                  |                                                                               |               |      |                                  |                                                                                |                                                                                                                      |                                                                              |                                                               |                                                                                        |
|-------------------------------------|----------------------------------------------------------------------------------|-------------------------------------------------------------------------------|---------------|------|----------------------------------|--------------------------------------------------------------------------------|----------------------------------------------------------------------------------------------------------------------|------------------------------------------------------------------------------|---------------------------------------------------------------|----------------------------------------------------------------------------------------|
| <b>Nunan, 2012</b> <sup>57</sup>    | Red Cross tents in public locations, Vienna, Austria                             | General public                                                                | 14-99         | 1793 | Trained paramedics               | Automated BP monitor. Uncrossed legs, arm at heart level, after 5 minutes rest | 140/90                                                                                                               | Direct approach                                                              | Not specified                                                 | Augmentation index and pressure                                                        |
| <b>Nykamp 1992</b> <sup>58</sup>    | Grocery stores and pharmacies, Atlanta, USA                                      | Adults attending pharmacy and grocery stores                                  | Not specified | 154  | Self-screening                   | Stationary monitors                                                            | Not specified                                                                                                        | Observed whilst using monitors and approached                                | Not specified                                                 | None                                                                                   |
| <b>Olenak 2010</b> <sup>59</sup>    | Pharmacy, Dallas, USA                                                            | Adult residents                                                               | >18 years     | 239  | Pharmacist and pharmacy students | Manual                                                                         | 130/85                                                                                                               | Newspaper adverts, TV interview, brochures in pharmacy and physician offices | Copy of results to patient, letter mailed to physician        | CVD risk scores, waist measurement, glucose, cholesterol                               |
| <b>Oster, 2013</b> <sup>60,61</sup> | Mobile clinics, Northern Alberta, Canada                                         | Canadians from off-reserve Aboriginal communities or rural towns              | 5-90          | 1439 | Nurses and dieticians            | 1 reading, seated after 5 minutes rest                                         | On antihypertensive medication, 140/90 if not diabetic, 130/80 if diabetic, >90 <sup>th</sup> percentile in children | Local advertising                                                            | Counselled on site and encouraged to follow up with physician | Waist circumference, BMI, blood glucose, hba1c, total cholesterol, HDL, urine dip, ACR |
| <b>Pepe 1989</b> <sup>62</sup>      | Barbershops, Akron Ohio, USA                                                     | Adult males attending the barbershops (predominantly black)                   | Not specified | 550  | Barbers                          | Automated                                                                      | Not specified                                                                                                        | Posters, supplement in local paper                                           | Written record provided                                       | Not specified                                                                          |
| <b>Rorie 2011</b> <sup>63</sup>     | Mobile health van, Boston, USA                                                   | Residents of areas where van parked (within 1 mile)                           | 18+           | 217  | Nurse                            | Not specified                                                                  | 140/90                                                                                                               | Peer discussion, flyers, door to door invites                                | Offered help making an appointment if screened positive       | Cholesterol, glucose, diabetes, dental disease                                         |
| <b>Schlundt 2006</b> <sup>64</sup>  | Churches, Universities, Clinics, Businesses and Community events, Nashville, USA | Adults attending the specified settings, predominantly African American area. | Not specified | 878  | Volunteers                       | Not specified                                                                  | 140/90                                                                                                               | Not specified                                                                | Not specified                                                 | Glucose, cholesterol                                                                   |
| <b>Shapiro 1982</b> <sup>65</sup>   | Shopping centres, Montreal, Canada                                               | Shopping members of public                                                    | Mean 44.1     | 1019 | Students                         | Seated, 2 measurements taken                                                   | Not specified                                                                                                        | Use of sign 'Free blood pressure screening here'                             | Not specified                                                 | None                                                                                   |
| <b>Shellman 2000</b> <sup>66</sup>  | Community elder centre, USA                                                      | Older adults attending the centre                                             | Not specified | 168  | Nurses                           | Not specified                                                                  | Not specified                                                                                                        | Approached at centre                                                         | Detailed consultation with the nurse                          | Yes but not specified                                                                  |
| <b>Silva 2008</b> <sup>67</sup>     | Portugal                                                                         | On street screening in                                                        | Mean 62 years | 293  | Pharmacy students                | Digital wrist device                                                           | Not specified                                                                                                        | Approached on street                                                         | Not specified                                                 | Blood glucose, BMI                                                                     |

|                                     |                                                                                                                                                    |                                                                                    |               |               |                                        |                                                                                                                    |                                           |                                                                                                 |                                                               |                                                               |
|-------------------------------------|----------------------------------------------------------------------------------------------------------------------------------------------------|------------------------------------------------------------------------------------|---------------|---------------|----------------------------------------|--------------------------------------------------------------------------------------------------------------------|-------------------------------------------|-------------------------------------------------------------------------------------------------|---------------------------------------------------------------|---------------------------------------------------------------|
|                                     |                                                                                                                                                    | unspecified area of Portugal                                                       |               |               |                                        |                                                                                                                    |                                           |                                                                                                 |                                                               |                                                               |
| <b>Speechley 1995</b> <sup>68</sup> | Oral surgery clinic, Warrington, UK                                                                                                                | Adults attending oral surgery clinic                                               | 21-57         | Not specified | Dentists                               | Automated, no not specified                                                                                        | Not specified                             | Attendees at clinic offered screening                                                           | Not specified                                                 | None                                                          |
| <b>Sproat 2009</b> <sup>69</sup>    | Dental practice, London, UK                                                                                                                        | Attendees at dental practice                                                       | 18+           | 114           | Dentist                                | Automated, one measurement                                                                                         | 140/90                                    | On attendance offered screening                                                                 | Measured >140/90 then advised to contact doctor               | Chron's dental anxiety scale                                  |
| <b>Strogatz 1985</b> <sup>70</sup>  | Churches, Edgecombe County, North Carolina                                                                                                         | Church attendees in two rural townships, one with black ethnicity, one with white. | 18-60         | 751           | Educated volunteers                    | Seated, 3 measurements                                                                                             | -/90 or current use of anti-hypertensives | Congregation screened plus outreach into community                                              | Not specified                                                 | History of BP diagnosis and/or treatment                      |
| <b>Taylor 2011</b> <sup>71</sup>    | Community centres and Churches, USA                                                                                                                | General population (targeting underserved populations)                             | Not specified | 378           | Student pharmacists                    | Not specified                                                                                                      | Not specified                             | Not specified                                                                                   | Result discussed with patient                                 | Lipids, CHD risk.                                             |
| <b>Thornley 2009</b> <sup>72</sup>  | Large pharmacy chain, UK                                                                                                                           | Pharmacy clients                                                                   | Not specified | 393           | Pharmacy staff                         | Not specified                                                                                                      | 140/90                                    | Health heart screen offered, tier 1 offering free BP screen, tiers 2 & 3 associated with charge | Not specified                                                 | BMI, waist circumference, cholesterol, glucose, HDL, CVD risk |
| <b>Ursua, 2013</b> <sup>73</sup>    | Faith-based and community organisations, local businesses, government groups, apartment complexes, schools and parks, New York and New Jersey, USA | Filipino population                                                                | >=18          | 1028          | Community health workers or nurses     | 3 readings from automated BP monitor in seated position, mean of 2 <sup>nd</sup> and 3 <sup>rd</sup> readings used | 140/90                                    | Mailed invitations, with follow-up by phone or in person by community partners                  | Exit interview                                                | Glucose, cholesterol, BMI                                     |
| <b>Victor 2011</b> <sup>74</sup>    | Barbershops, Dallas County, USA                                                                                                                    | Barbershop attendees (>95% black males)                                            | Mean 59.5     | 4676          | Barbers and field interviewers         | Automated, 6 reading over 2 days, average of 4 used                                                                | 135/85                                    | Posters in barbershop, verbal offers and word of mouth                                          | Written results, referral cards for physician/nurse follow up | Smoking status                                                |
| <b>Westerman 1990</b> <sup>75</sup> | GP office, West Holland, Netherlands                                                                                                               | Patient population for GP office                                                   | 30-69         | 1571          | Volunteers, nurses and lab technicians | Manual, no not specified                                                                                           | -/90                                      | Invitation via post                                                                             | Referred if diastolic >115                                    | CVD risk factors via questionnaire                            |
| <b>Willis</b>                       | Participants'                                                                                                                                      | General                                                                            | 18+           | 80            | Student                                | Seated, no other                                                                                                   | 140/90                                    | Door to door                                                                                    | BP >140 >90 told                                              | Heart rate                                                    |

|                    |                      |                                                              |  |  |            |        |  |         |                                                      |             |
|--------------------|----------------------|--------------------------------------------------------------|--|--|------------|--------|--|---------|------------------------------------------------------|-------------|
| 2012 <sup>76</sup> | homes, Illinois, USA | population (which includes high African American population) |  |  | volunteers | detail |  | invites | to see a healthcare professional as soon as possible | respiration |
|--------------------|----------------------|--------------------------------------------------------------|--|--|------------|--------|--|---------|------------------------------------------------------|-------------|

## Appendix D: Quality Assessment of Included Studies

|                                 | Did the patient selection method avoid introducing bias? | Are patients and settings appropriate to review? | Was blood pressure measured in a standardised manner? | Was a pre-specified, appropriate hypertension threshold used? | Was there blinding to existing hypertension status? |
|---------------------------------|----------------------------------------------------------|--------------------------------------------------|-------------------------------------------------------|---------------------------------------------------------------|-----------------------------------------------------|
| Abbott, 1989 <sup>1</sup>       | X                                                        | ✓                                                | ✓                                                     | ✓                                                             | ?                                                   |
| Agarwal, 2013 <sup>2</sup>      | X                                                        | ✓                                                | ?                                                     | ?                                                             | X                                                   |
| Ailinger, 1984 <sup>3</sup>     | ?                                                        | ✓                                                | ✓                                                     | ✓                                                             | X                                                   |
| Artz, 1981 <sup>4</sup>         | X                                                        | ✓                                                | ✓                                                     | ✓                                                             | ?                                                   |
| Banack, 2012 <sup>5</sup>       | ?                                                        | ✓                                                | ✓                                                     | ✓                                                             | X                                                   |
| Bandl, 1990 <sup>6</sup>        | ✓                                                        | ✓                                                | ✓                                                     | ✓                                                             | ?                                                   |
| Berkson, 1980 <sup>7</sup>      | X                                                        | ✓                                                | ?                                                     | ?                                                             | X                                                   |
| Berwick, 1985 <sup>8</sup>      | X                                                        | ?                                                | ?                                                     | ✓                                                             | ?                                                   |
| Bodden, 1980 <sup>9</sup>       | ✓                                                        | ✓                                                | ✓                                                     | ✓                                                             | ?                                                   |
| Bray, 1991 <sup>10</sup>        | X                                                        | ✓                                                | ?                                                     | ✓                                                             | ?                                                   |
| Brunt, 1992 <sup>11</sup>       | X                                                        | ?                                                | ✓                                                     | ✓                                                             | X                                                   |
| Campbell, 2001 <sup>12</sup>    | X                                                        | ✓                                                | ✓                                                     | ✓                                                             | ?                                                   |
| Carrington, 2008 <sup>13</sup>  | ?                                                        | ✓                                                | ?                                                     | ?                                                             | ?                                                   |
| Carrington, 2009a <sup>14</sup> | ?                                                        | ✓                                                | ?                                                     | X                                                             | ?                                                   |
| Carrington, 2009b <sup>15</sup> | X                                                        | ?                                                | ✓                                                     | ?                                                             | ?                                                   |
| Carrington, 2010 <sup>16</sup>  | X                                                        | ✓                                                | ✓                                                     | ✓                                                             | X                                                   |
| Carter, 1997 <sup>17</sup>      | X                                                        | ✓                                                | ?                                                     | ✓                                                             | ?                                                   |
| Cavaco, 2010 <sup>18</sup>      | X                                                        | ✓                                                | ✓                                                     | ✓                                                             | X                                                   |

|                                 |   |   |   |   |   |
|---------------------------------|---|---|---|---|---|
| Chioloero, 2008 <sup>19</sup>   | X | X | ✓ | ✓ | ? |
| Clark, 2000 <sup>20</sup>       | X | X | ? | ✓ | X |
| Cooke, 1983 <sup>21</sup>       | X | X | ? | ✓ | ? |
| Datri, 1980 <sup>22</sup>       | ✓ | ? | ✓ | ✓ | ✓ |
| Davidson, 2004 <sup>23</sup>    | X | X | ? | ? | ? |
| Diaz-Perez, 2004 <sup>24</sup>  | X | X | ? | ✓ | ? |
| Earle, 2001 <sup>25</sup>       | X | ✓ | ✓ | ✓ | X |
| Eason, 2012 <sup>26</sup>       | X | ✓ | ? | ✓ | ? |
| Edwards, 1981 <sup>27</sup>     | X | ✓ | ✓ | ✓ | ? |
| Elder, 1986 <sup>28</sup>       | ✓ | ✓ | ✓ | ✓ | ? |
| Engstrom, 2011 <sup>29</sup>    | X | ✓ | ✓ | ✓ | X |
| Frank, 2008 <sup>30</sup>       | ? | ✓ | ? | ✓ | X |
| Gany, 2012 <sup>31</sup>        | X | X | ? | ✓ | X |
| Ghuri, 2005 <sup>32</sup>       | X | X | ? | ? | X |
| Greenburg, 2007 <sup>33</sup>   | ✓ | ✓ | ? | ✓ | ? |
| Guay, 2011 <sup>34</sup>        | ? | ? | ? | ? | ? |
| Hamilton, 2003 <sup>35</sup>    | X | ✓ | ✓ | ✓ | X |
| Hampton, 1990 <sup>36</sup>     | X | ✓ | ? | X | ? |
| Harris, 2011 <sup>37</sup>      | ? | ? | ✓ | ✓ | ? |
| Hill, 2012 <sup>38</sup>        | X | ✓ | ? | ✓ | ? |
| Holmen, 1991 <sup>39</sup>      | X | ✓ | ✓ | ✓ | X |
| Houle, 2013 <sup>40-42</sup>    | ? | ✓ | ? | ✓ | ? |
| Huckerby, 2006 <sup>43</sup>    | X | ✓ | ? | ✓ | ✓ |
| Jacobsen, 1992 <sup>44</sup>    | X | ✓ | ✓ | ? | ? |
| Johnson 1984 <sup>45</sup>      | X | ✓ | ✓ | ✓ | ? |
| Jones 2008 <sup>46</sup>        | X | ✓ | ✓ | ✓ | ? |
| Kaczorowski 2011 <sup>47</sup>  | X | ✓ | ? | X | ? |
| Karwalajtys, 2013 <sup>48</sup> | ? | ✓ | ✓ | ✓ | X |
| Kling, 2013 <sup>49</sup>       | X | ? | ? | ? | ? |
| Latiff, 2012 <sup>50</sup>      | X | ? | ? | ✓ | ? |
| Lucky 2011 <sup>51</sup>        | X | ✓ | ? | ✓ | ? |
| Mangum 2003 <sup>52</sup>       | ? | ✓ | ✓ | ✓ | X |
| Manry, 2013 <sup>53</sup>       | X | ✓ | ? | ? | ? |
| Marshall, 2013 <sup>54</sup>    | ? | ✓ | ? | ✓ | X |
| McConaha, 2013 <sup>55</sup>    | X | ✓ | ? | ✓ | X |

|                              |   |   |   |   |   |
|------------------------------|---|---|---|---|---|
| Nugent 1980 <sup>56</sup>    | X | ? | ✓ | ✓ | ✓ |
| Nunan, 2012 <sup>57</sup>    | ? | ✓ | ✓ | ✓ | ? |
| Nykamp 1992 <sup>58</sup>    | ? | ✓ | ? | X | ? |
| Olenak 2010 <sup>59</sup>    | X | ✓ | ✓ | ✓ | ? |
| Oster, 2013 <sup>60,61</sup> | X | ✓ | ✓ | ✓ | ? |
| Pepe 1989 <sup>62</sup>      | ? | ✓ | ? | ? | ? |
| Rorie 2011 <sup>63</sup>     | X | ✓ | ? | ✓ | X |
| Schlundt 2006 <sup>64</sup>  | ? | ✓ | ? | ✓ | ? |
| Shapiro 1982 <sup>65</sup>   | ? | ✓ | ✓ | ? | X |
| Shellman 2000 <sup>66</sup>  | X | ? | ? | ? | ? |
| Silva 2008 <sup>67</sup>     | ? | ✓ | ? | ? | ? |
| Speechley 1995 <sup>68</sup> | ? | ✓ | ✓ | ? | ? |
| Sproat 2009 <sup>69</sup>    | ? | ✓ | ✓ | ✓ | ? |
| Strogatz 1985 <sup>70</sup>  | ? | ✓ | ? | ✓ | ? |
| Taylor 2011 <sup>71</sup>    | ? | ✓ | ? | ? | ? |
| Thornley 2009 <sup>72</sup>  | X | ? | ? | ✓ | ? |
| Ursua, 2013 <sup>73</sup>    | ? | ✓ | ✓ | ✓ | X |
| Victor 2011 <sup>74</sup>    | ✓ | ✓ | ✓ | ✓ | ? |
| Westerman 1990 <sup>75</sup> | X | ? | ? | ✓ | ? |
| Willis 2012 <sup>76</sup>    | X | ✓ | ? | ✓ | ? |

Content of boxes indicate the answers to the questions in Appendix B – green + tick for “yes”, yellow + question mark for “unclear”, and red + X for “no”

## Appendix E: Follow up of participants after screening

| Paper                     | Site              | Screeener     | Number screened | Number (%) found to be hypertensive at screening | N (% of hypertensives) referred | Number receiving a new diagnosis of hypertension after referral (% of referred) | Number receiving new or changed treatment for hypertension after referral (% of referred) | Number receiving a new hypertension diagnosis or treatment after referral (% of referred) |
|---------------------------|-------------------|---------------|-----------------|--------------------------------------------------|---------------------------------|---------------------------------------------------------------------------------|-------------------------------------------------------------------------------------------|-------------------------------------------------------------------------------------------|
| Bray, 1991 <sup>10</sup>  | participant homes | lay screeners | 3399            | 203 (6.0%)                                       | 67 (33.0%)                      | 17 (25.4)                                                                       | 13 (19.4)                                                                                 | 30 (44.8)                                                                                 |
| Brunt, 1992 <sup>11</sup> | community centres | nurses        | 811             | 338 (41.7%)                                      | not reported                    | not reported                                                                    | 61 (ns)                                                                                   | 61 (ns)                                                                                   |
| Datri, 1980 <sup>22</sup> | public buildings  | lay screeners | 189,006         | 68,240 (36.1%)                                   | not reported                    | not reported                                                                    | 53% of unaware or untreated hypertensives                                                 | 53% of unaware or untreated hypertensives                                                 |
| Edwards,                  | pharmacies        | pharmacists   | 215             | 13 (6.1%)                                        | 10 (76.9%)                      | 10 (100)                                                                        | 5 (50.0)                                                                                  | 10 (100)                                                                                  |

|                              |                  |                          |        |              |               |              |              |              |
|------------------------------|------------------|--------------------------|--------|--------------|---------------|--------------|--------------|--------------|
| 1981 <sup>27</sup>           |                  |                          |        |              |               |              |              |              |
| Engstrom, 2011 <sup>29</sup> | dental clinics   | dental hygienists        | 1149   | 237 (20.6%)  | 237 (100%)    | 76 (32.1)    | not reported | 76 (32.1)    |
| Hamilton, 2003 <sup>35</sup> | public buildings | self screening           | 769    | 221 (28.7%)  | 36 (16.3%) ^  | 11 (30.6)    | 10 (27.8)    | 16 (44.4)    |
| Holmen, 1991 <sup>39</sup>   | mobile stations  | nurses                   | 74,977 | 2399 (3.2%)  | 2399 (100%)   | 1413 (58.9)  | 406 (16.9)   | 1819 (75.8)  |
| Jones 2008 <sup>46</sup>     | pharmacies       | lay screeners            | 403    | 148 (36.7%)  | not reported  | not reported | 48 (ns)      | 48 (ns)      |
| Lucky 2011 <sup>51</sup>     | shopping centre  | lay screeners            | 958    | 170 (17.8%)  | 170 (100%)    | not reported | 29 (17.1)    | 29 (17.1)    |
| Mangum 2003 <sup>52</sup>    | pharmacy         | pharmacists              | 351    | 216 (61.5%)  | 121 (56.0%)   | 6 (5.0)      | 49 (40.5)    | 49 (40.5)    |
| Victor 2011 <sup>74</sup>    | barbershops      | lay screeners            | 2655   | 1055 (39.7%) | 180 (17.1%) ^ | not reported | not reported | not reported |
| Westerman 1990 <sup>75</sup> | health centre    | nurses and lay screeners | 1571   | 240 (15.3%)  | 63 (26.3)     | 29 (46.0)    | 18 (28.6)    | 29 (46.0)    |

^ documented physician visit used as proxy for referral

## References

1. Abbott SD, Alstad E, Yeo M. Blood pressure screening clinics: an opportunity for health promotion. *Canadian Journal of Public Health* 1989; **Revue Canadienne de Sante Publique**. **80**(6): 406-410.
2. Agarwal G, McDonough B, McLeod B, Angeles R, Marzenek-Lefebvre F, Dolovich L. A community health and wellness pilot in a subsidised seniors' apartment building: Chap-EMS. *Canadian Journal of Cardiology* 2013; **1**): S327-S328.
3. Ailinger RL. Hypertension screening for Hispanics. *Journal of Community Health Nursing* 1984; **1**(4): 265-270.
4. Artz L, Cooke CJ, Meyers A, Stalgaitis S. Community change agents and health interventions: hypertension screening. *American Journal of Community Psychology* 1981; **9**(3): 361-370.

5. Banack HR, Grover S, Kaouche M, Marchand S, Lowensteyn I. The MyHealthCheckup study: Training graduate students to implement cardiovascular risk screening programs in community pharmacies. *Canadian Pharmacists Journal* 2012; **145**(6): 268-275.
6. Bandl E, Boda K, Sonkodi S. Hypertension screening in a dental surgery: a Hungarian study. *Journal of Human Hypertension* 1990; **4**(3): 253-257.
7. Berkson DM, Brown MC, Stanton H. Changing trends in hypertension detection and control: The Chicago experience. *American Journal of Public Health* 1980; **70**(4): 389-393.
8. Berwick DM. Screening in health fairs. A critical review of benefits, risks, and costs. *JAMA* 1985; **254**(11): 1492-1498.
9. Bodden WR, Jr., Heaven TJ, Petrusnek F. Screening of dental clinic patients for hypertension. *Journal - Alabama Dental Association* 1980; **64**(4): 18-24.
10. Bray ML, Edwards LH. Prevalence of hypertension risk factors among Hispanic Americans. *Public Health Nursing* 1991; **8**(4): 276-280.
11. Brunt JH, Love EJ. Evaluation of hypertension screening in the Hutterite population. *Research in Nursing & Health* 1992; **15**(2): 103-110.
12. Campbell NR, Jeffrey P, Kiss K, Jones C, Anton AR. Building capacity for awareness and risk factor identification in the community: the blood pressure assessment program of the Calgary Fire Department. *Canadian Journal of Cardiology* 2001; **17**(12): 1275-1279.

13. Carrington M, Nadonza A, Jennings G, Stewart S. EVIDENCE OF SUSTAINED HIGH BLOOD PRESSURE IN THE AUSTRALIAN POPULATION: PRELIMINARY RESULTS FROM A NATIONAL BLOOD PRESSURE SCREENING DAY. *Hypertension* 2008; **52**(1): 166-166.
14. Carrington MC, Jennings G, Stewart S. Influence of equity of access to health care and socio-economic status on the blood pressure profile of vulnerable communities: Results from a national survey of 13,825 adults. *European Heart Journal* 2009; **Conference: European Society of Cardiology, ESC Congress 2009 Barcelona Spain. Conference Start: 20090829 Conference End: 20090902. Conference Publication: (var.pagings). 30:** 855-856.
15. Carrington MC, Nagendrarajah S, Stewart S. Prevalence of peripheral artery disease in at risk individuals in the community: Results from a mobile cardiovascular risk assessment program. *European Heart Journal* 2009; **Conference: European Society of Cardiology, ESC Congress 2009 Barcelona Spain. Conference Start: 20090829 Conference End: 20090902. Conference Publication: (var.pagings). 30:** 987-988.
16. Carrington MJ, Jennings GL, Stewart S. Pattern of blood pressure in Australian adults: results from a national blood pressure screening day of 13,825 adults. *International Journal of Cardiology* 2010; **145**(3): 461-467.
17. Carter LM, Godlington FL, Meechan JG. Screening for hypertension in dentistry. *Journal of Dental Research* 1997; **76**(5): 1037-1037.
18. Cavaco AN, Romano JP. Exploring pharmacist-customer communication: the established blood pressure measurement episode. *Pharmacy World & Science* 2010; **32**(5): 601-609.
19. Chiolero A, Prior J, Bovet P, Masson JC, Darioli R. Expectation to improve cardiovascular risk factors control in participants to a health promotion program. *Journal of General Internal Medicine* 2008; **23**(5): 615-618.



20. Clark MJ, Curran C, Noji A. The effects of community health nurse monitoring on hypertension identification and control. *Public Health Nursing* 2000; **17**(6): 452-459.
21. Cooke CJ, Meyers A. The role of community volunteers in health interventions: a hypertension screening and follow-up program. *American Journal of Public Health* 1983; **73**(2): 193-194.
22. Datri DA, Fitzgerald EF, Freeman DH, Vitale JN, Ostfeld AM. CONNECTICUT HIGH BLOOD-PRESSURE PROGRAM - PROGRAM OF PUBLIC-EDUCATION AND HIGH BLOOD-PRESSURE SCREENING. *Preventive Medicine* 1980; **9**(1): 91-107.
23. Davidson MR. Establishing prevention, education and community awareness through a comprehensive diabetes, hypertension and hypercholesterolaemia screening programme: The Smith Island, Maryland, USA experience. *International Journal of Nursing Practice* 2004; **10**(5): 242-246.
24. Diaz-Perez MdJ, Farley T, Cabanis CM. A program to improve access to health care among Mexican immigrants in rural Colorado. *Journal of Rural Health* 2004; **20**(3): 258-264.
25. Earle KA, Taylor P, Wyatt S, Burnett S, Ray J. A physician-pharmacist model for the surveillance of blood pressure in the community: a feasibility study. *Journal of Human Hypertension* 2001; **15**(8): 529-533.
26. Eason S, Sayers M, Goudar S, Centilli J. Hypertension screening among healthy adult volunteer blood donors. *Transfusion* 2012; **52**: 99A-100A.
27. Edwards C. Blood pressure measurement by pharmacists. *Journal of the Royal College of General Practitioners* 1981; **31**(232): 674-676.

28. Elder JP, McKenna CA, Lazieh M, Ferreira A, Lasater TM, Carleton RA. The use of volunteers in mass screening for high blood pressure. *American Journal of Preventive Medicine* 1986; **2**(5): 268-272.
29. Engstrom S, Berne C, Gahnberg L, Svardsudd K. Efficacy of screening for high blood pressure in dental health care. *BMC Public Health* 2011; **11**: 194.
30. Frank D, Grubbs L. A faith-based screening/education program for diabetes, CVD, and stroke in rural African Americans. *The ABNF journal : official journal of the Association of Black Nursing Faculty in Higher Education, Inc* 2008; **19**(3): 96-101.
31. Gany F, Levy A, Basu P, Misra S, Silberstein J, Bari S, Gill P, Keller N, Changrani J, Leng JC. Culturally Tailored Health Camps and Cardiovascular Risk among South Asian Immigrants. *Journal of Health Care for the Poor & Underserved* 2012; **23**(2): 615-625.
32. Ghouri N. Health fair in a mosque: putting policy into practice. *Public Health* 2005; **119**(3): 197-201.
33. Greenberg BL, Glick M, Goodchild J, Duda PW, Conte NR, Conte M. Screening for cardiovascular risk factors in a dental setting. *Journal of the American Dental Association* 2007; **138**(6): 798-804.
34. Guay K, Abrons J, Cerulli J. A Student pharmacist call to arms (advocating recommended men's health screenings). *Journal of the American Pharmacists Association* 2011; **Conference: APhA2011 Seattle, WA United States. Conference Start: 20100325 Conference End: 20100328. Conference Publication:(var.pagings).** 51 (2): 287-288.
35. Hamilton W, Round A, Goodchild R, Baker C. Do community based self-reading sphygmomanometers improve detection of hypertension? A feasibility study. *Journal of Public Health Medicine* 2003; **25**(2): 125-130.

36. Hampton A, Wilson A, Hussain M. Measuring blood pressure in an inner city pharmacy: an attempt at coordination with general practice. *Family Practice* 1990; **7**(1): 52-55.
37. Harris DE, Hamel L, Aboueissa A-M, Johnson D. A cardiovascular disease risk factor screening program designed to reach rural residents of Maine, USA. *Rural & Remote Health* 2011; **11**(3): 1-15.
38. Hill C, Zurakowski D, Bennet J, Walker-White R, Osman JL, Quarles A, Oriol N. Knowledgeable Neighbors: A Mobile Clinic Model for Disease Prevention and Screening in Underserved Communities. *American Journal of Public Health* 2012; **102**(3): 406-410.
39. Holmen J, Forsen L, Hjort PF, Midthjell K, Waaler HT, Bjorndal A. Detecting hypertension: screening versus case finding in Norway. *BMJ* 1991; **302**(6770): 219-222.
40. Houle SK, Chuck AW, Tsuyuki RT. Blood pressure kiosks for medication therapy management programs: business opportunity for pharmacists. *Journal of the American Pharmacists Association: JAPhA* 2012; **52**(2): 188-194.
41. Houle SK, Tsuyuki RT. Public-use blood pressure machines in pharmacies for identification of undetected hypertension in the community. *Journal of Clinical Hypertension* 2013; **15**(4): 302.
42. Tsuyuki RT, Houle SKD. Opportunities to improve hypertension care in the community: An analysis of over 8 million pharmacybased blood pressure kiosk readings. *Journal of Hypertension* 2012; **30**: e4.
43. Huckerby C, Hesslewood J, Jagpal P. Taking health care into black and minority communities - A pharmacist-led initiative. *Pharmaceutical Journal* 2006; **276**(7404): 680-682.

44. Jacobsen BK, Stensvold I, Fylkesnes K, Kristiansen IS, Thelle DS. The Nordland Health Study. Design of the study, description of the population, attendance and questionnaire response. *Scandinavian Journal of Social Medicine* 1992; **20**(3): 184-187.
45. Johnson CB, Meyers AW, Schleser R, Thackwray D. The role of student volunteers in door-to-door hypertension screening. *Journal of Community Health* 1984; **9**(3): 206-215.
46. Jones C, Simpson SH, Mitchell D, Haggarty S, Campbell N, Then K, Lewanczuk RZ, Sebaldt RJ, Farrell B, Dolovitch L, Kaczorowski J, Chambers LW. Enhancing hypertension awareness and management in the elderly: lessons learned from the Airdrie Community Hypertension Awareness and Management Program (A-CHAMP). *Canadian Journal of Cardiology* 2008; **24**(7): 561-567.
47. Kaczorowski J, Chambers LW, Dolovich L, Paterson JM, Karwalajtys T, Gierman T, Farrell B, McDonough B, Thabane L, Tu K, Zagorski B, Goeree R, Levitt CA, Hogg W, Laryea S, Carter MA, Cross D, Sabaldt RJ. Improving cardiovascular health at population level: 39 community cluster randomised trial of Cardiovascular Health Awareness Program (CHAP). *BMJ* 2011; **342**: d442.
48. Karwalajtys T, Kaczorowski J, Chambers LW, Hall H, McDonough B, Dolovich L, Sebaldt R, Lohfeld L, Hutchison B. Community mobilization, participation, and blood pressure status in a Cardiovascular Health Awareness Program in Ontario. *American Journal of Health Promotion* 2013; **27**(4): 252-261.
49. Kling JM, Miller VM, Mankad R, Wilansky S, Wu Q, Zais TG, Zaring KK, Allison TG, Mulvagh SL. Go Red for Women Cardiovascular Health-Screening Evaluation: The Dichotomy Between Awareness and Perception of Cardiovascular Risk in the Community. *Journal of Women's Health* 2013; **22**(3): 210-218.

50. Latiff NAA, Kaur S, Sundarajoo S. Research in brief - Nursing students' assessment of cardiovascular risk factors in a local community "thank the Alice Lee Centre for Nursing Studies, National University of Singapore for permission to reprint this abstract. *Singapore Nursing Journal* 2012; **39**(3): 31-32.
51. Lucky D, Turner B, Hall M, Lefaver S, de Werk A. Blood pressure screenings through community nursing health fairs: motivating individuals to seek health care follow-up. *Journal of Community Health Nursing* 2011; **28**(3): 119-129.
52. Mangum SA, Kraenow KR, Narducci WA. Identifying at-risk patients through community pharmacy-based hypertension and stroke prevention screening projects. *Journal of the American Pharmaceutical Association* 2003; **43**(1): 50-55.
53. Manry J, Peterson J. Reducing chronic disease: analysis of a community Wellness programme. *Journal of Community Nursing* 2013; **27**(3): 6-7.
54. Marshall SE, Cheng B, Northridge ME, Kunzel C, Huang C, Lamster IB. Integrating oral and general health screening at senior centers for minority elders. *American Journal of Public Health* 2013; **103**(6): 1022-1025.
55. McConaha JL, Berdine HJ, Skomo M. Implementation of a student pharmacist-directed cardiovascular risk-reduction screening event. *Currents in Pharmacy Teaching and Learning* 2013; **5**(4): 269-275.
56. Nugent CA, Gerlach BA. Hypertension control: the role of screening and referral to community physicians. *Preventive Medicine* 1980; **9**(4): 569-577.
57. Nunan D, Wassertheurer S, Lasserson D, Hametner B, Fleming S, Ward A, Heneghan C. Assessment of central haemodynamics from a brachial cuff in a community setting. *BMC Cardiovascular Disorders* 2012; **12**: 48.

58. Nykamp D, Barnett CW. Use of stationary automated blood pressure devices in pharmacies. *American Pharmacy* 1992; **NS32**(6): 33-36.
59. Olenak JL, Calpin M. Establishing a cardiovascular health and wellness program in a community pharmacy: Screening for metabolic syndrome. *Journal of the American Pharmacists Association* 2010; **50**(1): 32-U42.
60. Luyckx V, Bowker S, Miekle A, Toth E. Association of birth weight with risk factors for chronic kidney disease in rural caucasian and aboriginal Canadians. *Nephrology Dialysis Transplantation* 2012; **27**: ii111.
61. Oster RT, Luyckx VA, Toth EL. Birth weight predicts both proteinuria and overweight/obesity in a rural population of Aboriginal and non-Aboriginal Canadians. *J Dev Orig Hlth Dis* 2013; **4**(2): 139-145.
62. Pepe MV. Minority barbers screen customers for hypertension. *Health Education* 1989; **20**(7): 10-12.
63. Rorie J-A, Smith A, Evans T, Horsburgh CR, Jr., Brooks DR, Goodman R, Bunte D, Strunin L, de la Rosa D, Geller A. Using resident health advocates to improve public health screening and follow-up among public housing residents, Boston, 2007-2008. *Preventing Chronic Disease* 2011; **8**(1): A15.
64. Schlundt DG, Greene C, Reid R, McClellan L, Dowling L, Sheats JL, Brown A. An evaluation of the Nashville REACH 2010 community health screening strategy. *Journal of Ambulatory Care Management* 2006; **29**(2): 151-161.
65. Shapiro MF, Korda H, Robbins J. Diagnosis and treatment of low blood pressure in a Canadian community. *Canadian Medical Association Journal* 1982; **126**(8): 918-920.

66. Shellman J. Promoting elder wellness through a community-based blood pressure clinic. *Public Health Nursing* 2000; **17**(4): 257-263.
67. Silva E, Caramona M, Maricoto T, Silva VCE, Rocha R, Costa E, Oliveiros B, Ponciano E. Evaluation of a hypertension/diabetes screening campaign. *Pharmacy World & Science* 2008; **30**(5): 686-687.
68. Speechley JA, Hancock PA. A ROUTINE BLOOD-PRESSURE SCREENING SERVICE OF ADULTS ATTENDING THE COMMUNITY DENTAL SERVICE. *Journal of Dental Research* 1995; **74**(3): 874-874.
69. Sproat C, Beheshti S, Harwood AN, Crossbie D. Should we screen for hypertension in general dental practice? *British Dental Journal* 2009; **207**(6): 275-277.
70. Strogatz DS, James SA, Elliott D, Ramsey D, Cutchin LM, Ibrahim MA. Community coverage in a rural, church-based, hypertension screening program in Edgecombe County, North Carolina. *American Journal of Public Health* 1985; **75**(4): 401-402.
71. Taylor L, Holubar M, Sorensen T, Bartelson L. Stroke risk assessment and education in the underserved community. *Journal of the American Pharmacists Association* 2011; **Conference: APhA2011 Seattle, WA United States. Conference Start: 20100325 Conference End: 20100328. Conference Publication:**(var.pagings). 51 (2): 220.
72. Thornley T, Blenkinsopp A, Chapman S. Demography and cardiovascular risk profile of clients of a community pharmacy Healthy Heart service. *International Journal of Pharmacy Practice* 2009; **Conference: British Pharmaceutical Conference 2009 Manchester United Kingdom. Conference Start: 20090906 Conference End: 20090909. Conference Publication:**(var.pagings). 17 (S2): B41-B42.

73. Ursua R, Islam N, Aguilar D, Wyatt L, Tandon S, Abesamis-Mendoza N, Nur P, Rago-Adia J, Ileto B, Rey M, Trinh-Shevrin C. Predictors of Hypertension Among Filipino Immigrants in the Northeast US. *Journal of Community Health* 2013; **38**(5): 847-855.
74. Victor RG, Ravenell JE, Freeman A, Leonard D, Bhat DG, Shafiq M, Knowles P, Storm JS, Adhikari E, Bibbins-Domingo K, Coxson PG, Pletcher MJ, Hannan P, Haley RW. Effectiveness of a barber-based intervention for improving hypertension control in black men: the BARBER-1 study: a cluster randomized trial. *Archives of Internal Medicine* 2011; **171**(4): 342-350.
75. Westerman RF, Tesselaar HJ, Donker AJ. Screening for hypertension by volunteers in a middle-class community. *Journal of Human Hypertension* 1990; **4**(4): 330-333.
76. Willis J, Lloyd L, Jenkins W. Undergraduate students trained to provide basic health care screening in an underserved community: a door-to-door campaign. *Work* 2012; **41**(3): 277-284.
