# Supplementary material
Source: PubMed Central journal article supplement (PMC4601609)
Supplement: supp_hpv029_Fleming_AppendixG.pdf [file supp_hpv029_Fleming_AppendixG.pdf]

# Appendix G

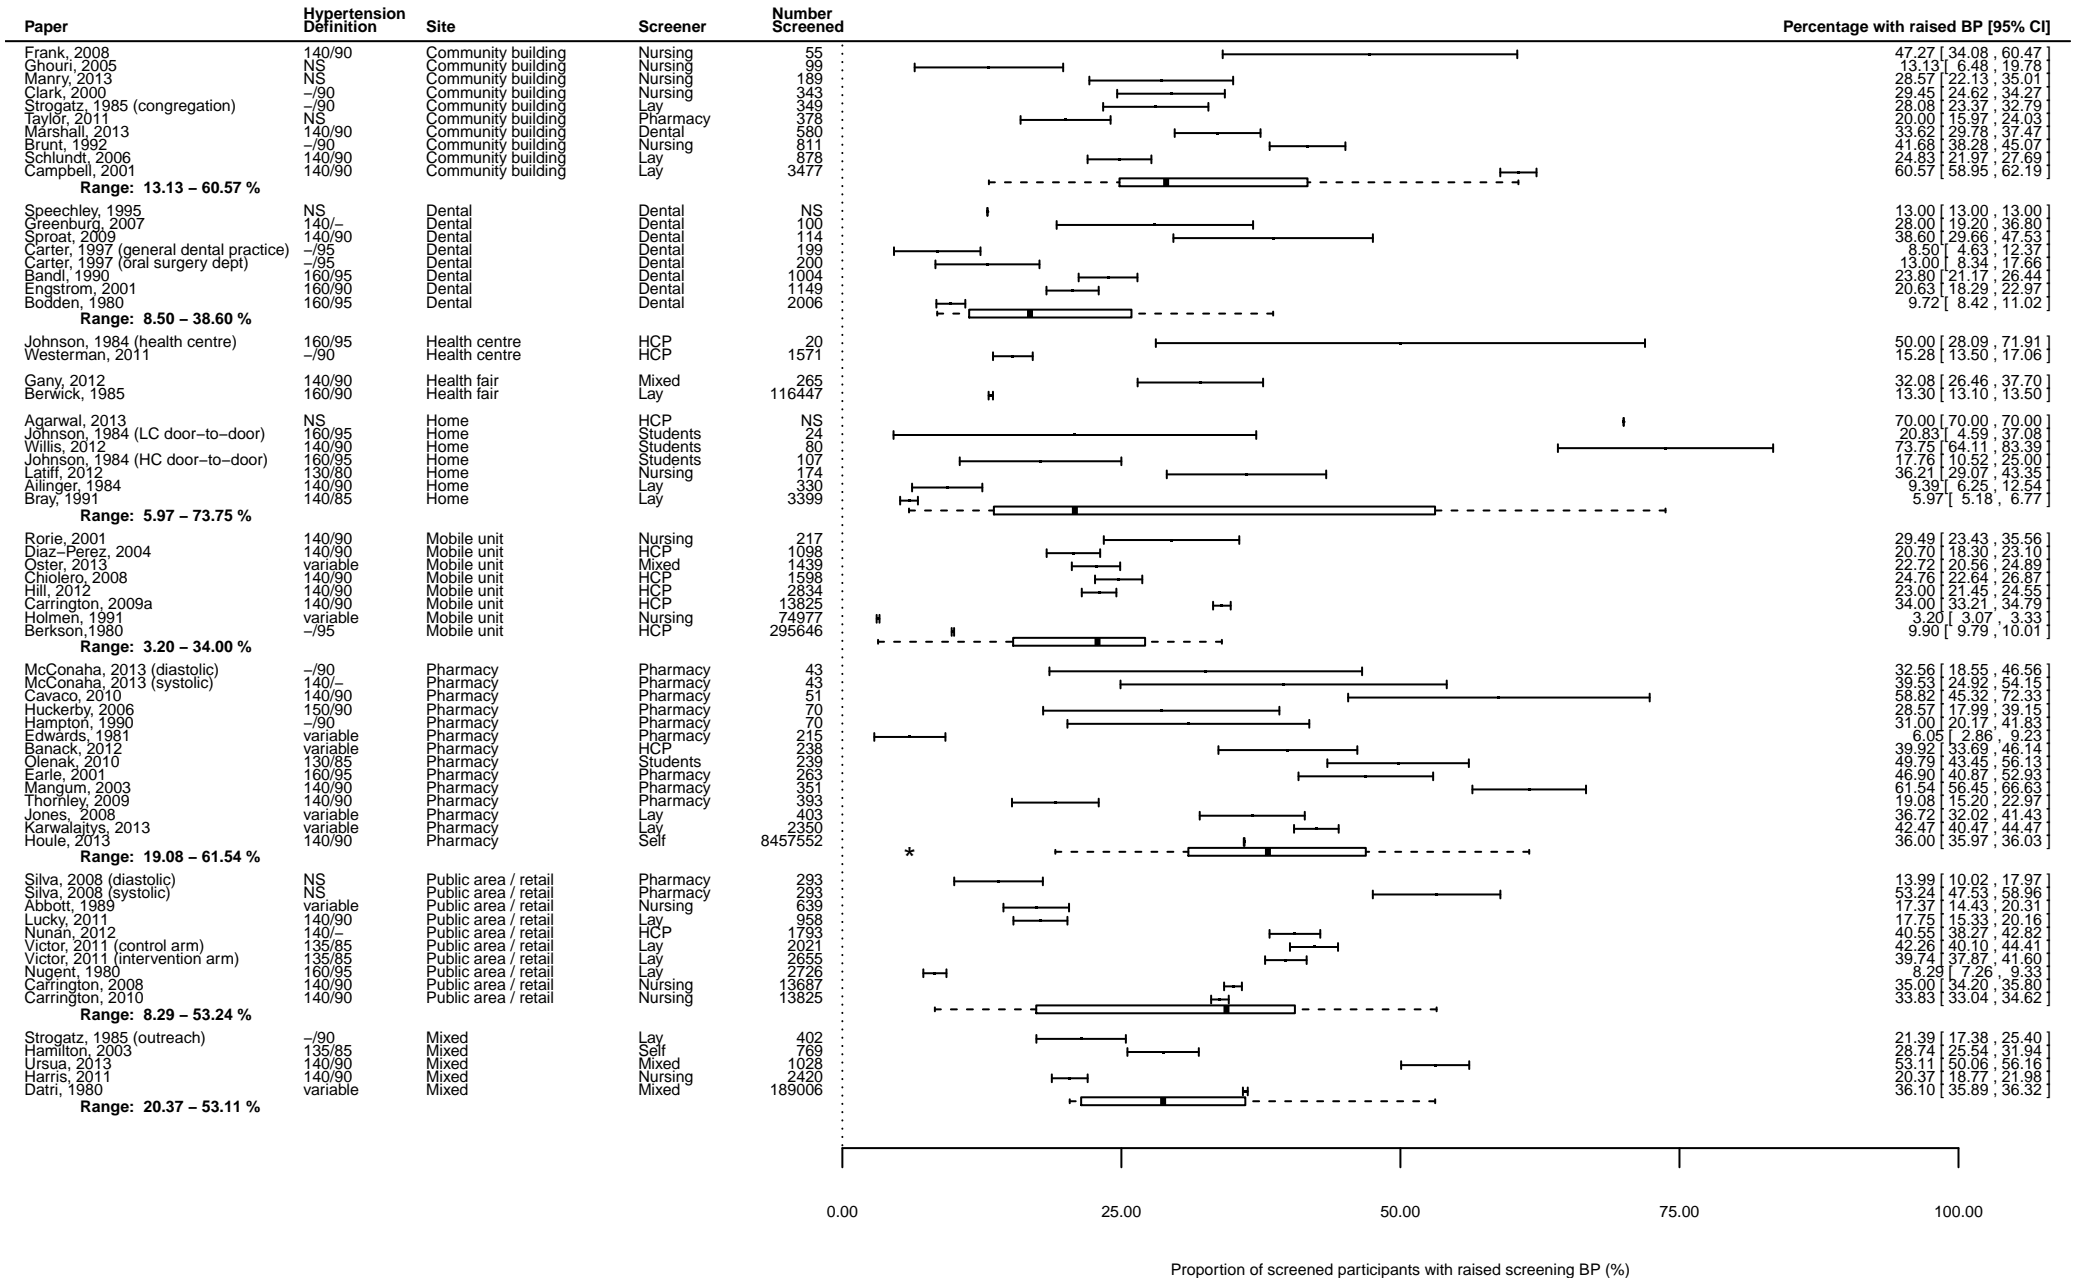

Proportion of screened participants with study-defined high blood pressure, ordered by site
